# Supplementary material for: Realist evaluation of the impact, viability and transferability of an alcohol harm reduction support programme based on mental health recovery: the Vitae study protocol
Source: HighWire-hosted journal article supplement (doi:10.1136/bmjopen-2022-065361), 2022-08-01
Supplement: bmjopen-2022-065361supp001_data_supplement.pdf [file bmjopen-2022-065361supp001_data_supplement.pdf]

Supplementary Table 1 : List of the centers involved in the Vitae study

| Location           | Name of the structure                       | Type of the structure |
|--------------------|---------------------------------------------|-----------------------|
| Nouvelle Aquitaine | Centre la Source Addictions -Mont de Marsan | CSAPA, CAARUD         |
|                    | Sauvegarde - AGEN                           | CSAPA                 |
|                    | CEID Addictions (ACT)- Bordeaux             | CSAPA                 |
|                    | Domercq SOS – Bordeaux                      | CHRS                  |
|                    | Association AJIR inclusion – Pau            | CHRS                  |
|                    | Association le Lien - Libourne              | CHRS                  |
| PACA               | Casanova – Marseille                        | CSAPA                 |
|                    | Maison Jaune - Arles                        | CSAPA                 |
|                    | Insertion La Selonne - Marseille            | CHRS                  |
|                    | Soliha - Marseille                          | IML                   |
