# Supplementary material for: Realist evaluation of the impact, viability and transferability of an alcohol harm reduction support programme based on mental health recovery: the Vitae study protocol
Source: HighWire-hosted journal article supplement (doi:10.1136/bmjopen-2022-065361), 2022-08-01
Supplement: bmjopen-2022-065361supp002_data_supplement.pdf [file bmjopen-2022-065361supp002_data_supplement.pdf]

Supplementary Table 2 : Variables included in the quantitative investigations

| Public        | Variables                                                                                                                                                                                                     | Questionnaire                                 | Data collection            | Time Collection         | Population                               |
|---------------|---------------------------------------------------------------------------------------------------------------------------------------------------------------------------------------------------------------|-----------------------------------------------|----------------------------|-------------------------|------------------------------------------|
| Beneficiaries | Medical status<br>Employment/support status<br>Substance and behavioral addiction (year of use, number of units use per day, etc.)<br>Family and social relationships<br>Legal status<br>Psychological status | Addiction Severity Index                      | semi-structured interviews | April 2021 - April 2022 | 10 centers<br>10 beneficiaries / centers |
|               | Inventory of the medical, psychosocial and psycho-educational contacts of the subject on the last 30 days                                                                                                     | Treatment Service Review                      |                            |                         |                                          |
|               | Frequency and intensity of craving during the last 30 days for each substance used regularly                                                                                                                  | Craving Evaluation Scale                      |                            |                         |                                          |
|               | Assessment of major psychiatric disorders: anxiety disorders, mood disorders, psychotic disorders, addictive disorders and eating disorders)                                                                  | Mini International Neuropsychiatric Interview |                            |                         |                                          |
|               | Assessment of personal empowerment                                                                                                                                                                            | Empowerment scale                             |                            |                         |                                          |
