# Supplementary material for: Realist evaluation of the impact, viability and transferability of an alcohol harm reduction support programme based on mental health recovery: the Vitae study protocol
Source: HighWire-hosted journal article supplement (doi:10.1136/bmjopen-2022-065361), 2022-08-01
Supplement: bmjopen-2022-065361supp003_data_supplement.pdf [file bmjopen-2022-065361supp003_data_supplement.pdf]

Supplementary Table 3 : Data expected in the transferability and viability study and time of collection

| Public                    | Variables                                                                                                                                                                                                                                                                                                                                                                                                                                                                                                                                                                                                                                                                                                                                                                                                                                                                                                                                                                                                                                                                                                                                                                    | Data collection                                     | Time Collection                      | Population                                                |
|---------------------------|------------------------------------------------------------------------------------------------------------------------------------------------------------------------------------------------------------------------------------------------------------------------------------------------------------------------------------------------------------------------------------------------------------------------------------------------------------------------------------------------------------------------------------------------------------------------------------------------------------------------------------------------------------------------------------------------------------------------------------------------------------------------------------------------------------------------------------------------------------------------------------------------------------------------------------------------------------------------------------------------------------------------------------------------------------------------------------------------------------------------------------------------------------------------------|-----------------------------------------------------|--------------------------------------|-----------------------------------------------------------|
| Centers and professionals | <p><b>Support principles:</b></p> <p>Overall support / all dimensions</p> <p>Possibly intensive support</p> <p>Action focused on consumption practices and contexts in a very detailed way (how the person consumes)</p> <p>Unconditional accompaniment with the reality of consumption</p> <p>Adjustment of support to the person's decision-making capacities/security</p> <p>Acting pragmatically to achieve a result ("here and now")</p> <p>Use consumption as a lever</p> <p>Make the team's availability explicit according to the needs of/being at the service of the person: Surround the person with the human, material and institutional resources necessary for his or her care journey, social environment and quality of life</p> <p>Reception of people with alcohol consumption, without any condition of change of consumption;</p> <p>Free approach to alcohol consumption, people's life strategies and skills;</p> <p>Possible offer of alcohol during the accompaniment</p> <p>Positioning affirmed in a break with the traditional system / No control or weaning proposal</p> <p>No abandonment, no judgment, respect/kindness, trust, alliance</p> | <p>Observation</p> <p>Professionals' interviews</p> | <p>October 2021r-<br/>April 2022</p> | <p>10 centers</p> <p>3<br/>professionals/<br/>centers</p> |

|               |                                                                                                                                                                                                                                                                                                                                                                                                                                                                                                                                                                                                                                                                                                                                                                                                                                                                                                                                                                                                                                                                                                                                                                                                                                                                                                                                                                                                                                                                                                                                                            |                                              |                              |                                               |
|---------------|------------------------------------------------------------------------------------------------------------------------------------------------------------------------------------------------------------------------------------------------------------------------------------------------------------------------------------------------------------------------------------------------------------------------------------------------------------------------------------------------------------------------------------------------------------------------------------------------------------------------------------------------------------------------------------------------------------------------------------------------------------------------------------------------------------------------------------------------------------------------------------------------------------------------------------------------------------------------------------------------------------------------------------------------------------------------------------------------------------------------------------------------------------------------------------------------------------------------------------------------------------------------------------------------------------------------------------------------------------------------------------------------------------------------------------------------------------------------------------------------------------------------------------------------------------|----------------------------------------------|------------------------------|-----------------------------------------------|
| Professionals | <p><b>Professional skills:</b></p> <p>Knowledge of the effects of the social norm on life courses</p> <p>Knowledge and experience of the drinking public</p> <p>Skills:</p> <ul style="list-style-type: none"> <li>• talking about alcohol;</li> <li>• to develop a project/prioritize areas of intervention for people;</li> <li>• observation (identification of the person's needs, benefits, risks, understanding ways of drinking);</li> <li>• to co-construct a program / to seek concrete solutions;</li> <li>• action-research methodology for support (risk-taking/creativity and project/rigor) - experimenting with people;</li> <li>• to sensitize/mobilize partners and resource structures;</li> <li>• alert and monitoring (vigilance on the overall health of people) - anticipation;</li> <li>• to mobilize resources from people;</li> <li>• to interact in a benevolent manner; to coordinate pathways/organizations</li> </ul> <p>Knowledge and experience of existing measures necessary to support the person who drinks alcohol (including health)</p> <p>Capacity to:</p> <ul style="list-style-type: none"> <li>• reinterview his place and role as a professional in the relationship;</li> <li>• propose an accompaniment of a "resultant" or interventional nature;</li> <li>• look more at resources than deficits; welcome in a friendly atmosphere;</li> <li>• maintain constant support (remains anchored in the program/stability);</li> <li>• adapt; convey an optimistic and reassuring vision of the future</li> </ul> | Observation<br><br>Professionals' interviews | October 2021r-<br>April 2022 | 10 centers<br><br>3 professionals/<br>centers |
|---------------|------------------------------------------------------------------------------------------------------------------------------------------------------------------------------------------------------------------------------------------------------------------------------------------------------------------------------------------------------------------------------------------------------------------------------------------------------------------------------------------------------------------------------------------------------------------------------------------------------------------------------------------------------------------------------------------------------------------------------------------------------------------------------------------------------------------------------------------------------------------------------------------------------------------------------------------------------------------------------------------------------------------------------------------------------------------------------------------------------------------------------------------------------------------------------------------------------------------------------------------------------------------------------------------------------------------------------------------------------------------------------------------------------------------------------------------------------------------------------------------------------------------------------------------------------------|----------------------------------------------|------------------------------|-----------------------------------------------|

|                                 |                                                                                                                                                                                                                                                                                                                                                                                                              |                                                                                      |                                  |                                                                    |
|---------------------------------|--------------------------------------------------------------------------------------------------------------------------------------------------------------------------------------------------------------------------------------------------------------------------------------------------------------------------------------------------------------------------------------------------------------|--------------------------------------------------------------------------------------|----------------------------------|--------------------------------------------------------------------|
|                                 | <p>Knowledge and experience of situations of social exclusion, discrimination, and lack of care pathways</p> <p>Willingness to work closely with people to integrate their expertise into their own intervention modalities</p> <p>Motivation / desire for involvement</p> <p>Versatility</p>                                                                                                                |                                                                                      |                                  |                                                                    |
| Centers and professionals       | <p><b>Functioning principles:</b></p> <p><b>External coordination/regulation</b></p> <p><b>Internal feedback coordination</b></p> <p><b>Small ratio of people</b></p>                                                                                                                                                                                                                                        | <p>Observation</p> <p>Professionals' interviews</p>                                  | <p>October 2021r- April 2022</p> | <p>10 centers</p> <p>3 professionals/ centers</p>                  |
| Centers and professionals       | <p><b>Contextual environment (micro and macro)</b></p> <p><b>Political will to fight against legal and illegal drugs, including DDR</b></p> <p><b>Financial support</b></p> <p><b>Precise inventory of the health system's offer likely to surround the person/ network of close partners made up of addictology care structures</b></p> <p><b>Support and regulations favorable to the intervention</b></p> | <p>Observation</p> <p>Professionals' interviews</p>                                  | <p>October 2021r- April 2022</p> | <p>10 centers</p> <p>3 professionals/ centers</p> <p>1 centers</p> |
| Professionals and beneficiaries | <p><b>Delivery conditions:</b></p> <p><b>Activities</b></p> <p><b>Travel to the person's place of residence with work on the rhythm and gestures of daily life</b></p> <p><b>Staging of the reception (scenography)</b></p>                                                                                                                                                                                  | <p>Observation</p> <p>Professionals' interviews</p> <p>Beneficiaries' interviews</p> | <p>October 2021- April 2022</p>  | <p>10 centers</p> <p>3 professionals/ centers</p>                  |

|                            |                                                                                                                                                                                                                                                                                                                                                                                                                                                                                                                                                                                                                                                                                 |                                                                        |                          |                                                                                             |
|----------------------------|---------------------------------------------------------------------------------------------------------------------------------------------------------------------------------------------------------------------------------------------------------------------------------------------------------------------------------------------------------------------------------------------------------------------------------------------------------------------------------------------------------------------------------------------------------------------------------------------------------------------------------------------------------------------------------|------------------------------------------------------------------------|--------------------------|---------------------------------------------------------------------------------------------|
|                            | <p><b>Co-construction and co-production of approaches to access to care and rights and, more generally, administrative procedures</b></p> <p><b>Decryption of/guidance on the health system and identification of environmental resources</b></p> <p><b>Telephone contacts (follow-up appointment, maintaining the link, taking news, etc.)</b></p> <p><b>Logistical preparation / material support (purchase of food, alcohol, etc.)</b></p> <p><b>Physical accompaniment to medical appointments, with other professionals or with family and friends</b></p> <p><b>Regular and close individual interviews, but scheduled at a pace to be determined with the person</b></p> |                                                                        |                          |                                                                                             |
| Mechanisms                 | <b>Variables</b>                                                                                                                                                                                                                                                                                                                                                                                                                                                                                                                                                                                                                                                                | Data collection                                                        | Time Collection          | Population                                                                                  |
| PSYCHOLOGICAL FUNCTIONING: | <b>Self-acceptance; Personal growth; Autonomy positive relationship; Control of your environment; Meaning of life</b>                                                                                                                                                                                                                                                                                                                                                                                                                                                                                                                                                           | Beneficiaries' interviews<br>Observations<br>Professionals' interviews | October 2021- April 2022 | 10 centers<br>100 beneficiaries<br>3 professionals/<br>centers<br>3 Santé!<br>Professionals |
| EMOTIONAL WELL-BEING       | <b>Positive affect; Quality of life</b>                                                                                                                                                                                                                                                                                                                                                                                                                                                                                                                                                                                                                                         | Beneficiaries' interviews                                              | October 2021- April 2022 | 10 centers                                                                                  |

|                     |                                                                                                                                             |                                                                        |                          |                                                                                      |
|---------------------|---------------------------------------------------------------------------------------------------------------------------------------------|------------------------------------------------------------------------|--------------------------|--------------------------------------------------------------------------------------|
|                     |                                                                                                                                             | Observations<br>Professionals' interviews                              |                          | 100 beneficiaries<br>3 professionals/centers<br>3 Santé! Professionals               |
| CAPACITIES          | <b>Motivation: Self-determination; Stress management; Putting alcohol in its right place; Effective adaptation strategy</b>                 | Beneficiaries' interviews<br>Observations<br>Professionals' interviews | October 2021- April 2022 | 10 centers<br>100 beneficiaries<br>3 professionals/centres<br>3 Santé! Professionals |
| SOCIAL FUNCTIONING: | <b>Social discounting; Social acceptance; Social contribution; Social coherence; Social integration</b><br><b>Family and social support</b> | Beneficiaries' interviews<br>Observations<br>Professionals' interviews | October 2021- April 2022 | 10 centers<br>100 beneficiaries<br>3 professionals/centers<br>3 Santé! Professionals |
